# Supplementary material for: A Bayesian non-inferiority approach using experts’ margin elicitation – application to the monitoring of safety events
Source: Springer Nature journal article supplement (doi:10.1186/s12874-019-0826-5), 2019-09-18
Supplement: MOESM3 [file 17185208]

Parameters of the mixtures retained to fit the acceptable differences between arms  $D_j$  <sup>1</sup>

|                                                                       | Event ( $j$ )  |                  |                  |                |
|-----------------------------------------------------------------------|----------------|------------------|------------------|----------------|
|                                                                       | Death          | IVH <sup>2</sup> | NEC <sup>3</sup> | Retinopathy    |
| <b>Method with the best criteria for goodness of fit</b> <sup>4</sup> | Manual mixture | Manual + Betamix | Betamix function | Manual mixture |
| <b>Parameters of the mixture</b> <sup>1</sup>                         |                |                  |                  |                |
| $(a_{1,j}, b_{1,j})$                                                  | (0.13, 79.68)  | (0.14, 26.62)    | (4.71, 207.08)   | (0.18, 39.33)  |
| $w_{1,j}$                                                             | 0.50           | 0.55             | 0.52             | 0.50           |
| $(a_{2,j}, b_{2,j})$                                                  | (2, 29.59)     | (5.62, 38.5)     | (0.13, 8.67)     | (5.41, 159.3)  |
| $w_{2,j}$                                                             | 0.50           | 0.09             | 0.48             | 0.50           |
| $(a_{3,j}, b_{3,j})$                                                  | na             | (14.93, 367.09)  | na               | na             |
| $w_{3,j}$                                                             | na             | 0.36             | na               | na             |

na = not applicable

<sup>1</sup> $D_j$  : Acceptable difference of event  $j$  between arms; the distribution of  $D_j$  is denoted  $D_j \sim f(a_{1,j}, b_{1,j}, a_{2,j}, b_{2,j}, a_{3,j}, b_{3,j}, w_{1,j}, w_{2,j}, w_{3,j})$ , where  $(a_{1,j}, b_{1,j})$ ,  $(a_{2,j}, b_{2,j})$  and  $(a_{3,j}, b_{3,j})$  are parameters for the 3 *beta* distributions, and  $(w_{1,j}, w_{2,j}, w_{3,j})$  the corresponding weights.

<sup>2</sup>IVH: Intraventricular hemorrhage

<sup>3</sup>NEC: Necrotizing enterocolitis

<sup>4</sup>To fit the acceptable difference between arms  $D_j$  as mixtures of beta regression using maximum likelihood estimation through the `betareg` package on R software, 3 different estimation methods were adopted and compared using a criteria for goodness of fit based on area under curves (See Box 1 in the main manuscript and section 1 of the Web-Appendix C for details): (the first (`betamix` function) mathematically driven and the other two (Manual mixture; Manual + `betamix` function) empirically driven): the first (`betamix` function) mathematically driven and the other two (Manual mixture; Manual + `betamix` function) empirically driven.
