# Supplementary material for: A Bayesian non-inferiority approach using experts’ margin elicitation – application to the monitoring of safety events
Source: Springer Nature journal article supplement (doi:10.1186/s12874-019-0826-5), 2019-09-18
Supplement: MOESM8 [file 17185208]

## Physician experts who participated in the elicitation, BETADOSE trial.

| Investigator             | Hospital                                                  | City               |
|--------------------------|-----------------------------------------------------------|--------------------|
| ALEXANDRE Cénéric        | CHU Caen Normandie                                        | Caen               |
| BALITALIKE Jadot         | CH Valenciennes                                           | Valenciennes       |
| BAUD Olivier             | HU Robert-Debré (APHP)                                    | Paris              |
| BLANC Julie              | Hôpital Nord (AP-HM)                                      | Marseille          |
| BOIZE Philippe           | CH René Dubos                                             | Pontoise           |
| BOHEC Caroline           | CH Pau                                                    | Pau                |
| BOUET Pierre-Emmanuel    | CHU Angers                                                | Angers             |
| BOURTEMBOURG MATRAS Aude | CHRU Jean Minjoz                                          | Besançon           |
| BREVAUT-MALATY Véronique | Hôpital Nord (AP-HM)                                      | Marseille          |
| CAMBONIE Gilles          | Hôpital Arnaud de Villeneuve - CHU Montpellier            | Montpellier        |
| CASPER Charlotte         | Hôpital des enfants - CHU de Toulouse                     | Toulouse           |
| CHAULEUR Céline          | Hôpital Nord - CHU Saint Etienne                          | Saint Etienne      |
| COSTE-MAZEAU Perrine     | Hôpital Mère-Enfant - CHU de Limoges                      | Limoges            |
| CUDEVILLE Corinne        | CH Bretagne-Atlantique                                    | Vannes             |
| DE LUCA Daniele          | Hôpital Antoine-Beclere - HU Paris Sud (APHP)             | Clamart            |
| DEBILLON Thierry         | Hôpital Couple-Enfant - CHU Grenoble Alpes                | Grenoble           |
| DERUELLE Philippe        | Hôpital Jeanne de Flandres - CRHU de Lille                | Lille              |
| DESFRERE Luc             | Hôpital Louis-Mourier - HU Paris Nord Val-de-Seine (APHP) | Colombes           |
| DI MAIO Massimo          | HU Carémeau                                               | Nîmes              |
| DORET Muriel             | Hôpital Femme-Mère-Enfant - Hospices Civils de Lyon       | Bron               |
| DREYFUS Michel           | CHU Caen Normandie                                        | Caen               |
| DURRMEYER Xavier         | Centre Hospitalier Intercommunal                          | Créteil            |
| ECKMAN LACROIX Astrid    | CHRU Jean Minjoz                                          | Besançon           |
| FLAMANT Cyril            | Hôpital Mère-Enfant - CHU de Nantes                       | Nantes             |
| GALLOT Denis             | CHU Clermont-Ferrand                                      | Clermont-Ferrand   |
| GASCOIN Géraldine        | CHU Angers                                                | Angers             |
| GOFFINET François        | Hôpital Port-Royal - HU Paris Centre (APHP)               | Paris              |
| HECKENROTH Hélène        | Hôpital de la Conception (AP-HM)                          | Marseille          |
| HOULLIER Marie           | Hôpital Bicêtre - HU Paris Sud (APHP)                     | Le Kremlin Bicêtre |
| JARREAU Pierre-Henri     | Hôpital Port-Royal - HU Paris Centre (APHP)               | Paris              |
| LANGER Bruno             | Hôpital de Hautepierre - HU Strasbourg                    | Strasbourg         |
| LAPILLONNE Alexandre     | Hôpital Necker - HU Paris Centre (APHP)                   | Paris              |
| LE SACHE Nolwenn         | Hôpital Bicêtre - HU Paris Sud (APHP)                     | Le Kremlin Bicêtre |
| MADELENEAU Doriane       | CH Bretagne-Atlantique                                    | Vannes             |
| MANDELBROT Laurent       | Hôpital Louis-Mourier - HU Paris Nord Val-de-Seine (APHP) | Colombes           |
| PAGES Anne-Sophie        | CH du Cotentin                                            | Cherbourg          |
| PATURAL Hugues           | Hôpital Nord - CHU Saint Etienne                          | Saint Etienne      |
| PONCELET Christophe      | CH René Dubos                                             | Pontoise           |
| RAYSSIGUIER Romy         | Hôpital Arnaud de Villeneuve                              | Montpellier        |
| RIGONNOT Luc             | Centre Hospitalier Sud Francilien                         | Corbeil-Essonnes   |
| SCHMITZ Thomas           | HU Robert-Debré (APHP)                                    | Paris              |
| SENTILHES Loic           | CHU de Bordeaux                                           | Bordeaux           |
| TILLOUCHE Nadia          | CH Valenciennes                                           | Valenciennes       |
| TOURNEUX Pierre          | CHU Amiens-Picardie                                       | Amiens             |
| WASZAK Paul              | Hôpital Delafontaine                                      | Saint Denis        |
