# Supplementary material for: A Bayesian non-inferiority approach using experts’ margin elicitation – application to the monitoring of safety events
Source: BMC Med Res Methodol. 2019 Sep 18;19:187. doi: 10.1186/s12874-019-0826-5 (PMC6751616; doi:10.1186/s12874-019-0826-5)
Supplement: Supplementary file 10 — Example of the code to simulate the results for one event (neonatal death): In the part A, it fit margins from experts’ elicitation, using a fictive data set of experts’ answers (E1). In the part B, it simulate the trials and compute the differences of the posterior samplers for M pairs, for one scenario, using one informative prior. In the part C, it calculate the posterior probability that the difference of rate of events is higher than the acceptable difference according to experts, and compute the decision using a threshold of 0.50. (R 26 kb) [file 12874_2019_826_MOESM10_ESM.r]

# define your files' location

chemin <- '/Users/caupiais/Dropbox/THESE-CAMILLE/THESE_Betadose/BETADOSE-EE/Betadose-EE_Valorisation/Article/Soumission2-BMCmrm/3eme-soumission/code-publi/'


# packages ----------------------------------------------------------------------------------------------------------------------------------------

library(betareg)
library(flexmix)
library(plyr)
library(rstan)
library(xtable)
options(xtable.floating = FALSE)
options(xtable.timestamp = "")


##################################################################################################################################################################################################################
#######################################################################                     PART A                  #######################################################################
#######################################################################    Fit margins from experts' elicitation    #######################################################################
##################################################################################################################################################################################################################


# Load data base for experts' answers; or simulate using the above code  (Data set E1 for experts) ----------------------------------------------

scenario.exp <- 'e1'

mu = 0.20
phi = 50
a =  mu*phi
b = phi*(1-mu)
a
b

SED = 49
set.seed(SED)
x=seq(0.0001, 0.9999, 0.0001)
y=rbeta(44, shape1=a, shape2=b)
e1= round(y, 2)


# Modeling Safety Margins from experts elicitation   -------------------------------------------------------------------------------------------------------

#     create the functions to compare the criteria for goodness of fit

auc.hist.center = function(y){                                  # Area under the curve of an histogram
  {x <- rep(0.01, 101)
  hist <- hist (y, freq = FALSE, breaks = seq(-0.005, to = 1.005, by = 0.01), right = T)  
  y <- hist$density
  }
  x*y
}

auc.dbeta.center = function(a, b)                               # Area under the curve of a beta distribution
{
  auc <- NULL
  int <-  integrate(dbeta, shape1 = a, shape2 = b, lower = 0, upper = 0.005)
  int <- int$value
  auc <- c(auc, int)
  
  x2 <- seq(0.005, to = 0.995, by = 0.01)  
  for (l in x2)
  {
    int2 <-  integrate(dbeta, shape1 = a, shape2 = b, lower = l, upper = l+0.01)
    int2 <- int2$value
    auc <- c(auc, int2)
  }
  return(auc)
}

auc.dbeta.mix.center = function(a1, b1, a2, b2, w)                # Area under the curve of a mixture of 2 beta distributions
{  auc <- NULL

betamix4 <- function(y, a1, b1, a2, b2, w){
  w * dbeta(y, shape1 = a1, shape2 = b1) + (1-w) * dbeta(y, shape1 = a2, shape2 = b2)
}
int <-  integrate(betamix4, lower = 0, upper = 0.005, w = w, a1 = a1, b1 = b1, a2 = a2, b2 = b2)
int <- int$value
auc <- c(auc, int)

x2 <- seq(0.005, to = 0.995, by = 0.01) 

for (l in x2)
{ 
  betamix4 <- function(y, a1, b1, a2, b2, w){
    w * dbeta(y, shape1 = a1, shape2 = b1) + (1-w) * dbeta(y, shape1 = a2, shape2 = b2)
  }
  int2 <-  try(integrate(betamix4, lower = l, upper = l+0.01, w = w, a1 = a1, b1 = b1, a2 = a2, b2 = b2))
  
  if(isTRUE(class(int2)=="try-error") 
  ) { next } 
  else { 
    int2 <- int2$value
    auc <- c(auc, int2)
  }
}
return(auc)
}


auc.dbeta.mix3.center = function(a1, b1, a2, b2, a3, b3, w1, w2)                 # Area under the curve of a mixture of 3 beta distributions
{
  auc <- NULL
  betamix5 <- function(y, a1, b1, a2, b2, a3, b3, w1, w2){
    w1 * dbeta(y, shape1 = a1, shape2 = b1) + w2 * dbeta(y, shape1 = a2, shape2 = b2) + (1-w1-w2) * dbeta(y, shape1 = a3, shape2 = b3)
  }
  int <-  integrate(betamix5, lower = 0, upper = 0.005, w1 = w1, w2 = w2, a1 = a1, b1 = b1, a2 = a2, b2 = b2, a3 = a3, b3 = b3)
  int <- int$value
  auc <- c(auc, int)
  
  x2 <- seq(0.005, to = 0.995, by = 0.01) 
  for (l in x2)
  { 
    betamix5 <- function(y, a1, b1, a2, b2, a3, b3, w1, w2){
      w1 * dbeta(y, shape1 = a1, shape2 = b1) + w2 * dbeta(y, shape1 = a2, shape2 = b2) + (1-w1-w2) * dbeta(y, shape1 = a3, shape2 = b3)
    }
    int2 <-  try(integrate(betamix5, lower = l, upper = l+0.01, w1 = w1, w2 = w2, a1 = a1, b1 = b1, a2 = a2, b2 = b2, a3 = a3, b3 = b3))
    if(isTRUE(class(int2)=="try-error") 
    ) { next } 
    else { 
      int2 <- int2$value
      auc <- c(auc, int2)
    }
  }
  return(auc)
}


compar.auc.center = function (y, data) {                # Compare AUC histogram and AUC of mixture of beta distributions using the 3 options (Option betamix function,Option manual mixture of 2 betareg function,Option manual mixture of a betamix function and a betareg function) 
                                                        # and extract the option with the best criteria 
  
  value <- sort(as.numeric(levels(as.factor(y))))
  imin <- value[3]
  imin3 <- value[4]
  imax <- value[length(value)-1]
  imax3 <- value[length(value)-2]
  
  auc.hist <- auc.hist.center(y)                                                 # auc histogramme 
  
  y.data <- as.data.frame(y)
  beta1 <- betamix (y.data ~ 1 , data = y.data, k = 1,  link = "logit")          # Fit = Option betamix function
  mu.beta1<- plogis(coef(beta1)[1])
  phi.beta1<- exp(coef(beta1)[2])
  a.beta1<- mu.beta1 * phi.beta1
  b.beta1 <- (1 - mu.beta1) * phi.beta1  
  auc.dbeta1 <- auc.dbeta.center(a = a.beta1, b = b.beta1)                      
  diff <- sum(abs(auc.dbeta1- auc.hist))
  nbeta <- 1
  seuil1 <- NA
  w = NA
  a1 <- a.beta1
  b1 <- b.beta1
  a2 <- NA
  b2  <- NA
  line <- cbind(nbeta, seuil1, w, diff, a1, b1, a2, b2)
  
   
  tab2 <- NULL                                                                    # Fit = Option manual mixture of 2 betareg function
  for (i in seq (from = imin, to = imax, by = 0.01)) {                                   # i = level for dichotomization of observed values 
    y1 <- as.data.frame(y.data[y.data<i])
    y2 <- as.data.frame(y.data[y.data>=i])
    
    for (j in seq (from = 0, to = 1, by = 0.05)) {
      
      first.beta2 <- betamix(y1~ 1, data = y1, k = 1, link = "logit")
      first.mu.beta2 <- plogis(coef(first.beta2)[1])
      first.phi.beta2 <- exp(coef(first.beta2)[2])
      first.a.beta2<- first.mu.beta2  * first.phi.beta2
      first.b.beta2 <- (1 - first.mu.beta2 ) * first.phi.beta2  
      
      second.beta2 <- betamix(y2 ~ 1 , data = y2, k = 1, link = "logit")
      second.mu.beta2 <- plogis(coef(second.beta2)[1])
      second.phi.beta2 <- exp(coef(second.beta2)[2])
      second.a.beta2 <- second.mu.beta2  * second.phi.beta2
      second.b.beta2 <- (1 - second.mu.beta2 ) * second.phi.beta2  
      
      auc.dbeta2 <- auc.dbeta.mix.center(a1 = first.a.beta2, b1 = first.b.beta2, a2 = second.a.beta2, b2 = second.b.beta2, w = j) 
      diff <- sum(abs(auc.dbeta2 - auc.hist))
      nbeta <- 2
      seuil1 <- i
      w <- j
      a1 <- first.a.beta2
      b1 <-  first.b.beta2
      a2 <- second.a.beta2
      b2  <- second.b.beta2
      line2 <- cbind(nbeta, seuil1, w, diff, a1, b1, a2, b2)
      tab2 <- rbind.data.frame(tab2, line2)
    }
  }
  table <- rbind (line, tab2)
  
  min <- min(table$diff)
  best.auc <- table[table$diff == min , ]
  return(best.auc)
}


# Fit margins from experts' elicitation   -----------------------------------------------------------------------------------------------------------------------------------------------------


auc.hist <- auc.hist.center(e1)                                     # AUC of histogram


auto <- betamix(e1 ~ 1 , k = 1:3, nstart = 10, link = "logit")      # Option betamix function
nbeta <-auto[["flexmix"]]@k0
beta1 <- betamix(e1 ~ 1 , k = nbeta, nstart = 10, link = "logit")

              if (nbeta == 1) {
                m1 <- plogis(coef(beta1)[1])
                phi1 <- exp(coef(beta1)[2])
                a1<- m1 * phi1 
                b1 <- (1 - m1) * phi1   
                auc.dbeta1 <- auc.dbeta.center(a = a1, b = b1)
                diff <- sum(abs(auc.dbeta1 - auc.hist))            #diff =  criteria of goodness of fit
                seuil1 <- NA
                w1 <- 1
                w2 <- 0
                a2 <- a1
                b2 <- b1               
                a3 <- a1
                b3 <- b1
                option <- "betamix"
                option.betamix <- cbind.data.frame(option, nbeta, seuil1,  w1, w2, diff, a1, b1, a2, b2, a3, b3)       # extract the betamix function with the best criteria of goodness of fit
              }
              
              if (nbeta == 2) {
                m <- plogis(coef(beta1)[,1])
                phi <- exp(coef(beta1)[,2])
                a<- m * phi 
                b <- (1 - m) * phi   
                auc.dbeta1 <- auc.dbeta.mix.center(w = prior(beta1$flexmix)[1], a1 = a[1], b1 = b[1], a2 = a[2], b2 = b[2])
                diff <- sum(abs(auc.dbeta1 - auc.hist))
                seuil1 <- NA
                a1 <- a[1]
                b1 <- b[1]
                a2 <- a[2]
                b2 <- b[2]
                option <- "betamix"
                w1 <- prior(beta1$flexmix)[1]
                w2 <- 0
                a3 <- a2
                b3 <- b2
                option.betamix <- cbind.data.frame(option, nbeta, seuil1, w1, w2, diff, a1, b1, a2, b2, a3, b3)       # extract the betamix function with the best criteria of goodness of fit
              }
              
              if (nbeta == 3) {
                m <- plogis(coef(beta1)[,1])
                phi <- exp(coef(beta1)[,2])
                a<- m * phi 
                b <- (1 - m) * phi   
                auc.dbeta1 <- auc.dbeta.mix3.center(w1 = prior(beta1$flexmix)[1], w2 = prior(beta1$flexmix)[2],  a1 = a[1], b1 = b[1], a2 = a[2], b2 = b[2], a3 = a[3], b3 = b[3])
                diff <- sum(abs(auc.dbeta1 - auc.hist))
                seuil1 <- NA
                a1 <- a[1]
                b1 <- b[1]
                a2 <- a[2]
                b2 <- b[2]
                a3 <- a[3]
                b3 <- b[3]
                option <- "betamix"
                w1 <- prior(beta1$flexmix)[1]
                w2 <- prior(beta1$flexmix)[2]
                option.betamix <- cbind.data.frame(option, nbeta, seuil1, w1, w2, diff, a1, b1, a2, b2, a3, b3)       # extract the betamix function with the best criteria of goodness of fit
              }


best.auc <- compar.auc.center (y = e1)                               # Option manual mixture of 2 betareg function
                                                                     # extract the manual mixture with the best criteria of goodness of fit
best.auc <-best.auc[1,]                                              # take the first line if several mixtures with same criteria
      w2 <- 0
      option <- "manual mixture of 2 betareg"    
      option.manual <- cbind.data.frame(option, best.auc$nbeta, best.auc$seuil1, best.auc$w , w2, best.auc$diff, best.auc$a1, best.auc$b1, best.auc$a2, best.auc$b2, best.auc$a2, best.auc$b2)
      colnames(option.manual) <- c("option", "nbeta", "seuil1",  "w1", "w2", "diff", "a1", "b1", "a2", "b2", "a3", "b3")

                                                   

best.auc$seuil1                                                       # Option manual mixture of a betamix function and a betareg function
data <- e1[e1 >= best.auc$seuil1]                                     # extract the level for dichotomization of observed values                     
option <- "manual mixture of betareg + betamix" 
beta3<-try(betamix(data ~ 1, k = 2, link = "logit"))                  # mixture above this threhold
            if (class(beta3)=="try-error")
                    {
                    option.manual.mix <- cbind.data.frame(option, NA, best.auc$seuil1,  NA, NA, NA, NA, NA, NA, NA, NA, NA)
                    colnames(option.manual.mix) <- c("option", "nbeta", "seuil1",  "w1", "w2", "diff", "a1", "b1", "a2", "b2", "a3", "b3")
                    }
            
            if (class(beta3)!="try-error")
                    {
                      p.beta3 <- prior(beta3$flexmix)
                    w2 <- p.beta3[1] * (1-best.auc$w)
                    mu.beta3 <- plogis(coef(beta3)[,1])
                    phi.beta3 <- exp(coef(beta3)[,2])
                    a.beta3 <- mu.beta3 * phi.beta3 
                    b.beta3 <- (1 - mu.beta3) * phi.beta3
                    auc.dbeta3 <- auc.dbeta.mix3.center(w1 = best.auc$w, w2 = w2, a1 = best.auc$a1, b1 = best.auc$b1, a2 = a.beta3[1], b2 = b.beta3[1],  a3 = a.beta3[2], b3 = b.beta3[2])  
                    diff <- sum(abs(auc.dbeta3 - auc.hist))                 # diff <- criteria of goodness of fit
                    option.manual.mix <- cbind.data.frame(option, best.auc$nbeta, best.auc$seuil1,  best.auc$w, w2, diff, best.auc$a1, best.auc$b1, a.beta3[1], b.beta3[1], a.beta3[2], b.beta3[2])
                    colnames(option.manual.mix) <- c("option", "nbeta", "seuil1",  "w1", "w2", "diff", "a1", "b1", "a2", "b2", "a3", "b3")
                    }


option3 <- rbind(option.betamix, option.manual, option.manual.mix)

option3.noNA <- option3[is.na(option3$diff)==F, ] 
best3 <- option3.noNA[option3.noNA$diff == min(option3.noNA$diff), ]     # among the 3 methods, extract the mixture with the best criteria of goodness of fit
best3 <- best3[1,]

  
# save the parameters of the best mixture  
            param.e1 <- cbind.data.frame(scenario.exp, best3)
            
      
# compute base with paramters for differetn data set of experts
            param.experts <- rbind.data.frame(param.e1)          
            eval(parse(text = paste("save (param.experts, file='", chemin , "param.simul.experts.Rdata')",sep="")))
            

            
            
##################################################################################################################################################################################################################
#######################################################################                     PART B                                          #######################################################################
#######################################################################    Compute the differences of the posterior samplers for M pairs    #######################################################################
##################################################################################################################################################################################################################

            scenari <- c("T1")                  # list the different scenari
            
            experts <- c("e1")                   # list the different data set of experts
            
            priori <- c("prior9")                # list the different prior 
            
            TR <- 10                           # number of trials
            
            
# Load data base of the trial ; or simulate using the above code  (scenario T1) ------------------------------------------------------------------------------------------------


N = 3146 # sample size

pgrp = 0.5 # proba grp

p1 = 0.10     # proba prema groupe 1
p2 = 0.3666     # (proba prema groupe 2 !!!!!!! si pas groupe 1 = 0.33/0.90 )

pDEATH1 <- 0.39    # proba death in full dose born < 28
pDEATH2 <- 0.05    # proba death in full dose born 28-32
pDEATH3 <- 0.005   # proba death in full dose born >= 32

pDEATH1_hd <- pDEATH1 * 1.2    # proba death in half dose born < 28
pDEATH2_hd <- pDEATH2 * 1.2    # proba death in half dose born 28-32
pDEATH3_hd <- pDEATH3 * 1.2    # proba death in half dose born >= 32

SED = 387

for (tr in 1:TR) {       
  
  set.seed(SED)
  
  tab <- NULL
  
  for (i in 1:N){
    
    a = rbinom(1,1,prob=pgrp) 		# to decide the grp
    
    if (a==1) {
      g = rbinom(1,1,prob=p1) 		# to decide the subgroup of term
      
      if (g==1) {
        grp <- 1
        group <- 9
        TERME <- 1
        DEATH <- rbinom(1,1,pDEATH1)
        pat = c(i, g, group, TERME, DEATH, a, grp) # collect all data for the same patient
      } 
      
      if (g==0)  {
        group = rbinom(1,1,prob=p2)  
        
        if (group == 1)	{
          grp <- 1
          TERME <- 2
          DEATH <- rbinom(1,1,pDEATH2)
          pat = c(i, g, group, TERME, DEATH, a, grp) # collect all data for the same patient
        }  
        
        if (group == 0)	{
          grp <- 1
          TERME <- 3
          DEATH <- rbinom(1,1,pDEATH3)
          pat = c(i, g, group, TERME, DEATH, a, grp) # collect all data for the same patient
        }  
      } 
    }
    
    if (a==0) {
      g = rbinom(1,1,prob=p1) 		# to decide the subgroup of term
      
      if (g==1) {
        grp <- 2
        group <- 9
        TERME <- 1
        DEATH <- rbinom(1,1,pDEATH1_hd)
        pat = c(i, g, group, TERME, DEATH, a, grp) # collect all data for the same patient
      } 
      
      if (g==0)  {
        group = rbinom(1,1,prob=p2)  
        
        if (group == 1)	{
          grp <- 2
          TERME <- 2
          DEATH <- rbinom(1,1,pDEATH2_hd)
          pat = c(i, g, group, TERME, DEATH, a, grp) # collect all data for the same patient
        }  
        
        if (group == 0)	{
          grp <- 2
          TERME <- 3
          DEATH <- rbinom(1,1,pDEATH3_hd)
          pat = c(i, g, group, TERME, DEATH, a, grp) # collect all data for the same patient
        }  
      } 
    }
    
    tab <- rbind(tab,pat) #to put patients in a dataset. Each row is a pat 
    colnames(tab)=c("i", "g", "group", "TERME", "DECES", "a", "grp")
    data <- as.data.frame(tab)
    
    eval(parse(text = paste("save (data, file='", chemin , "SimulT1_t", tr, ".Rdata')",sep="")))
    
  }
  
  SED = SED + tr  }   


# creating variable attribuating the number of the analyse to each obsevation (random)         

for (scenario in scenari){
  
  for (tr in 1:TR) { 
    
    eval(parse(text = paste("load('", chemin , "Simul", scenario, "_t", tr, ".Rdata')",sep="")))
    
    data <- data
    data  <- data [ ,c("i", "TERME", "grp", "DECES")]
    
    SEDi <- 35464 + tr
    ana <- c(rep(1, 300), rep(2, 300), rep(3, 300), rep(4, 300), rep(5, 300), rep(6, 300), rep(7, 300), rep(8, 300), rep(9, 300), rep(10, 300), rep(11, 146))
    set.seed(SEDi)
    data$analyse <- sample (ana, 3146)
    
    data$scenario  <- scenario 
    
    data$trial <- tr
    
    eval(parse(text = paste("save (data, file='", chemin , "Simul", scenario, "_t", tr, ".Rdata')",sep="")))
    
  }
}


# Create the stan model object using Stan's syntax  ---------------------------------------------------------------------------------------------------------------------------

stanmodelcode.bis = "
data {                      // Data block
int<lower=1> N1;           // Sample size grp 1
int<lower=1> N2;           // Sample size grp 2
int y1[N1] ;                // Target variable
int y2[N2] ;
real afd ;
real bfd ;
real ahd ;
real bhd ;
}

parameters {                // Parameters block
real<lower=0.001, upper=0.999> p1;      // arm1
real<lower=0.001, upper=0.999> p2;      // arm2
}

transformed parameters
{
  real diff;
  diff = p2-p1;
}         
  
  model {                     // Model block
  // likelihood
  y1 ~ bernoulli(p1);
  y2 ~ bernoulli(p2);
  
  // priors
  p1 ~ beta(afd , bfd);
  p2 ~ beta(ahd , bhd);
  }
  
  /*
  generated quantities {      // Generated quantities block. Not used presently.
  }
  */
  
  "
  
  
  # load table with prior parameters or create the table ---------------------------------------------------------------------------------------------------------------------------
  
  #eval(parse(text = paste("load('", chemin , "prior.9.RDS')",sep="")))
  
  prior.ab <- c("death", 1, 29, 44, 32, 41)
  colnames(prior.ab) <- c("event", "term", "a.fd", "b.fd", "a.hd", "b.hd")
  

  # Run the stan model for each trial of the senario with the elect prior  HERE prior 9 --------------------------------------------------------------------------------------------------------------------------------------------------
  
  for (scenario in scenari){
  
  for (tr in 1:TR) { 
    
    # data
    eval(parse(text = paste("load('", chemin , "Simul", scenario, "_t", tr, ".Rdata')",sep="")))

    for (k in 11:11)   {               # only the last  analysis : if analyse <= k 
      
      safe <-  data[data$analyse <= k, ]
      
      # creating vectors 
      for (i in 1:1) {                # only terme == 1 (born before 28)
        for (j in 1:2) {
          eval(parse(text = paste("d_grp", j, "_term",i, " <- safe$DECES[safe$grp == j & safe$TERME == i & is.na(safe$DECES) ==F ]",sep="")))
        }
        
        # Create the data list object for stan inupt
        eval(parse(text = paste("dat_d_term",i, " = list(N1=length(d_grp1_term", i , "), N2=length(d_grp2_term", i , "), y1=d_grp1_term", i, ", y2=d_grp2_term", i, ", afd=prior.ab$a.fd[prior.ab$event=='death' & prior.ab$term== i ], bfd=prior.ab$b.fd[prior.ab$event=='death' & prior.ab$term== i ], ahd=prior.ab$a.hd[prior.ab$event=='death' & prior.ab$term== i ], bhd=prior.ab$b.hd[prior.ab$event=='death' & prior.ab$term== i ])",sep="")))   
      }
      
      # Run the model and examine results #
      
      SED <- (2789 + tr + k)
      
      set.seed(SED)
      
      eval(parse(text = paste("fit_d_term1_analyse",k, "<-  stan (model_code=stanmodelcode.bis, data=dat_d_term1, iter=4000, chains=3 , control = list(max_treedepth = 15))",sep="")))
      
      # save stan fit 
      eval(parse(text = paste("saveRDS(fit_d_term1_analyse",k, ", file = '" ,chemin , "fit_d_term1_scenario", scenario, "_trial", tr,  "_analyse",k, ".prior9.rds')",sep="")))
    }
  }
  }  
  


  ##################################################################################################################################################################################################################
  #######################################################################                     PART C                                         #######################################################################
  #######################################################################    Calculate the posterior probability that the difference of rate of events is higher         #######################################################################
  #######################################################################    than the acceptable difference according to experts                                         #######################################################################
  ##################################################################################################################################################################################################################
  

  # Load margins from experts: Beta distribution   ------------------------------------------------------
  
  eval(parse(text = paste("load(file='", chemin , "param.simul.experts.Rdata')",sep="")))
  
  # Create the function for computing the probability  ------------------------------------------------------
  
  checking1 <- function(x,target,error) {
    sum(x>(target+error))/length(x)
  }
  
  # Calculate the posterior probability, using Stan stimulations  
  
  proba_all_trial <- NULL 
  
  
  for (p in 1:length(priori)){
    
    prior <- priori[p]
    
    for (l in 1:length(scenari)){
      
      scenario <- scenari[l]
      
      for (tr in 1:TR) { 
        
        for (k in 11:11)   {               # k analyses
          
          # read stan fit 
          
          eval(parse(text = paste("fit_d_term1_analyse",k, "<- readRDS(file = '", chemin , "fit_d_term1_scenario", scenario, "_trial", tr,  "_analyse",k, ".", prior ,".rds')",sep="")))
          eval(parse(text = paste("sampl_d_term1 <- extract(fit_d_term1_analyse", k, ", pars=c('p1', 'p2', 'diff'))", sep="")))            
          
          SED <- 123 + tr + l
          
          set.seed(SED)
          x1=runif(10000)
          
          # checking probability for each of the 3 scenarios on experts' answers
          
          for (e in 1:length(experts) ) { 
            
            # checking with margin as distribution 
            
            exp <- experts[e]  
            data <- param.experts[param.experts$scenario.exp == exp, ]
            
            n=10000
            a1=data$a1
            b1=data$b1
            a2=data$a2
            b2=data$b2
            a3=data$a3
            b3=data$b3
            w1=data$w1
            w2=data$w2
            
            temp = cbind(rbeta(n,a1,b1),rbeta(n,a2,b2),rbeta(n,a3,b3))
            
            ##random generation of the indices
            id = sample(1:3,n,rep = T,prob = c(w1,w2,1-w1-w2))  
            id = cbind(1:n,id)
            x1 = temp[id]
            
            res_x1<-rep(NA,length(x1))
            for(i in 1:length(x1)){
              res_x1[i]=checking1(x=sampl_d_term1$diff, target= x1[i], error = 0)
            }
            pest_d_value_distrib <- mean(res_x1)
            

            # compute table with results 
            
            analysis <- k
            trial <- tr
            proba_d1 <- cbind.data.frame (data$scenario.exp,  pest_d_value_distrib,  analysis, trial, scenario, prior)
            
            proba_all_trial <- rbind.data.frame(proba_d1, proba_all_trial) 
          }      
        }
      }
    }
  }
  colnames(proba_all_trial) <- c("scenario.exp" ,  "pest_d_value_distrib" , "analysis" , "trial" , "scenario", "prior")
  
  str(proba_all_trial) 


  
# apply the decision rule : here, we will decide that the difference is unacceptable if posterior probability >= O.5    ---------------------------------------------------------------------
              proba_all_trial$ccl50_distrib[proba_all_trial$pest_d_value_distrib>=0.50] <- 1
              proba_all_trial$ccl50_distrib[proba_all_trial$pest_d_value_distrib < 0.50] <- 0
              

# save
eval(parse(text = paste("save(proba_all_trial, file ='", chemin , "proba_all_trial')",sep="")))
  
